# Supplementary material
Source: publisher figshare collection journal article supplement (https://sage.figshare.com/ndownloader/files/24134925)
Supplement: Supplementary file 1 [file 24134925]

**Fig. S1. Synthesis scheme of PolyMet polymer.**

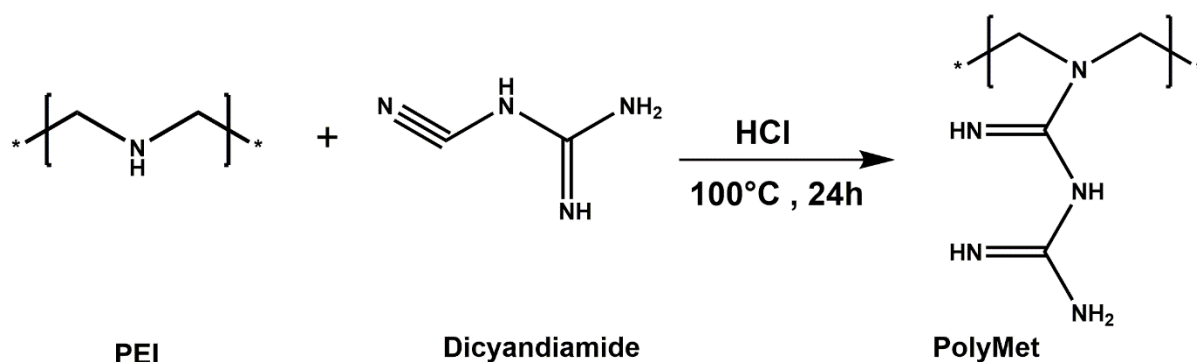

**Fig. S2. Characterization of PolyMet polymer.** (A)  $^1\text{H}$  NMR spectra of PolyMet. (B) FT-IR spectra of PolyMet.

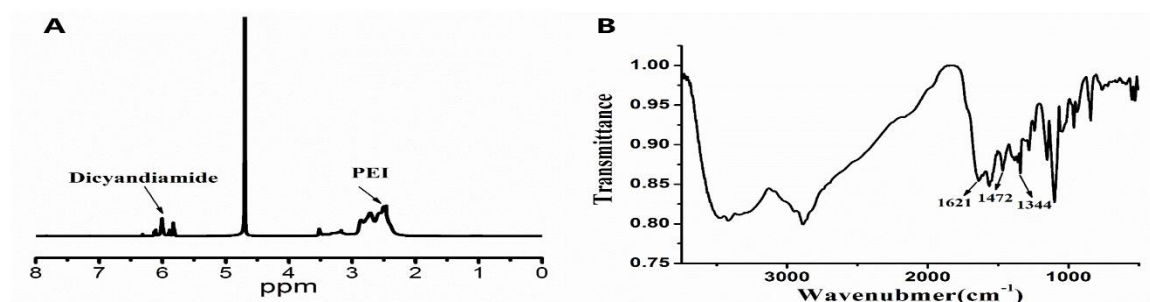

**Fig. S3. Cytotoxicity of PEI<sub>1.8K</sub> and PolyMet alone.** (A) Cell viability of PEI<sub>1.8K</sub> and PolyMet to myotubes cell determined by MTT assay. (B) Cell viability of PEI<sub>1.8K</sub> and PolyMet to podocytes cell determined by MTT assay.

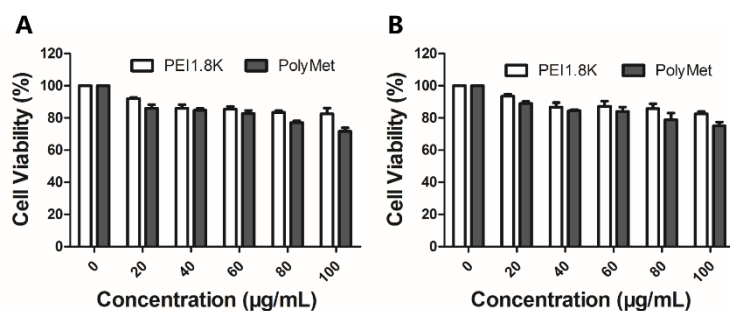

**Table S1**

Characterization of PolyMet-HA nanocomplexes by Dynamic Light Scattering and Zeta potential Measurements<sup>a</sup>

|                               | PolyMet-HA nanocomplexes |
|-------------------------------|--------------------------|
| hydrodynamic diameter (d, nm) | 102.9 ± 3.8              |
| polydispersity index(PDI)     | 0.156                    |
| Zeta potential (mV)           | 23 ± 0.2                 |

<sup>a</sup> Data are presented as mean ± SD of four independent preparations.
